1        **Media representation of spiders may exacerbate arachnophobic sentiments by**  
2        **framing a distorted perception of risk**

3

4        Stefano Mammola<sup>1,\*</sup>, Veronica Nanni<sup>2</sup>, Paolo Pantini<sup>3</sup>, Marco Isaia<sup>4</sup>

7        <sup>1</sup> Molecular Ecology Group (MEG), Water Research Institute, National Research Council of Italy (CNR-IRSA),  
8        Largo Tonolli 50, 28922 Verbania Pallanza, Italy

9        <sup>2</sup> Department of Earth, Environmental and Life Science (DISTAV), University of Genoa, Via Balbi, 5, 16126  
10        Genova, Italy

11        <sup>3</sup> Museo civico di Scienze Naturali “E. Caffi.”, Piazza Cittadella 10, 24129, Bergamo, Italy

12        <sup>4</sup> Department of Life Sciences and Systems Biology, University of Turin, Via Accademia Albertina 13, 10123  
13        Torino, Italy

14

16        \*corresponding author: [stefano.mammola@cnr.it](mailto:stefano.mammola@cnr.it)

17        (Orcid ID: <http://orcid.org/0000-0002-4471-9055>)

18 **ABSTRACT**

19 Spiders are able to arouse strong emotional reactions in humans. While spider bites are  
20 statistically rare events, our perception is skewed towards the potential harm spiders can cause to  
21 humans. We examined the human dimension of spiders through the lens of traditional media, by  
22 analysing more than 300 spider-related news published online in Italian newspapers between  
23 2010 and 2020. We observed a recent, exponential increase in the frequency of the news,  
24 particularly those focused on medically important spiders – the Mediterranean black widow  
25 (*Latrodectus tredecimguttatus*) and the Mediterranean recluse (*Loxosceles refescens*). The news  
26 quality was generally poor: 70% contained different types of error, 32% were exaggerated, and  
27 in virtually none was an expert consulted. Overstated news referring to spider bites were  
28 significantly more shared on social media, thus contributing to frame a distorted perception of  
29 the risk associated with a spider bite and possibly reducing general public tolerance of spiders.

30

31 **Keywords:** Arachnophobia; Black widows; Emotional contagion; Envenomation; Facebook;  
32 Fake news; Latrodectism; Loxoscelism; Mass media, Recluse spiders; Social media; Spider bite

## 33 INTRODUCTION

34 Wildlife is an important emotional trigger in humans (Jacobs, 2009, 2012; Hicks & Stewart,  
35 2018). Admiration and respect, surprise and excitement, transcendent feelings, but also fear and  
36 disgust are just a few examples illustrating the spectrum of emotions reported by people  
37 experiencing encounters with wildlife (Hicks & Stewart, 2018). An interesting aspect of the  
38 human dimension of wildlife is that sensitivity toward animals is largely conserved in most  
39 contemporary societies, even though wildlife no longer plays a central role in our every-day lives  
40 (Franklin & White, 2001). Studies suggest that emotional feelings toward wildlife are, indeed,  
41 in-born (Strommen, 1995; Davey et al., 1998; Prokop & Tunnicliffe, 2008; DeLoache, Pickard,  
42 & LoBue, 2010), often recurring with striking similarities across diverse cultural settings (Davey  
43 et al., 1998). As a direct consequence, animals-related emotions end up playing a key role in  
44 scientific and socio-political debates around both the management and conservation of wildlife  
45 (Jones, 2006; Singh, 2009; Frank, Johansson, & Flykt, 2015; Zainal Abidin & Jacobs, 2019;  
46 Drijfhout, Kendal, & Green, 2020; Straka, Miller, & Jacobs, 2020), and in the perception of risk  
47 (Knopff, Knopff, & St. Clair, 2016; Hathaway et al., 2017; Bombieri et al., 2018; Nanni et al.,  
48 2020).

49 Spiders are iconic examples of animals that can bring about strong emotional reactions in  
50 humans (Michalski & Michalski, 2010; Lemelin & Yen, 2015; Hauke & Herzig, 2017;  
51 Mammola, Michalik, Hebets, & Isaia, 2017), leading to a distorted perception of risk, especially  
52 when referring to spider bites. While less than 0.5% of spider species are capable of causing  
53 severe envenomation in humans (Hauke & Herzig, 2017), and no proven fatality due to spider  
54 bites had occurred in the past few decades (Nentwig & Kuhn-Nentwig, 2013; Nentwig,  
55 Gnädinger, Fuchs, & Ceschi, 2013; Stuber & Nentwig, 2016), the perception of the risk  
56 associated with spider bites remains skewed towards the potential harm spiders can cause in  
57 humans (Hauke & Herzig, 2017). These feelings seemingly find their psychological roots in our  
58 ancestral fear of venomous animals (Knight, 2008; Gerdes, Uhl, & Alpers, 2009), but might also  
59 have a cultural component (Davey, 1994; Merckelbach, Muris, & Schouten, 1996; Davey et al.,  
60 1998). As Cavell (2018, p. 2) nicely put it “... *one of the most remarkable aspects of modern*  
61 *human-spider relations is the prevalence of arachnophobia in places with few or no highly*  
62 *dangerous spider species*”. Indeed, even though human-spiders encounters are frequent events

63 because spiders are omnipresent in all terrestrial ecosystems (Turnbull, 1973), including indoor  
64 environments (Bertone et al., 2016), the objective risk of being bitten by a harmful spider is  
65 minimal in most areas of the world (Diaz & Leblanc, 2007). These considerations raise the  
66 questions of why such a skewed perception of risk persists in modern societies (Lemelin & Yen,  
67 2015).

68 It is known that humans have the tendency to evaluate risk through feelings and emotions  
69 rather than objectively (Slovic & Peters, 2006), often overestimating the frequency of  
70 statistically rare events. For example, many people fear flying, even though the casualties  
71 associated with civil flights are estimated to be in the order of 0.07 deaths per billion passenger  
72 miles (Savage, 2013). The same line of reasoning can be applied to people's risk judgments of  
73 low probability events related to wildlife, such as being attacked by a large carnivore (Bombieri  
74 et al., 2018) or stung or bitten by a venomous animal (Langley, 2005).

75 Furthermore, a distorted perception of risk can be exacerbated by the way in which  
76 information is framed in the scientific literature (Bennett & Vetter, 2004; Stuber & Nentwig,  
77 2016) or in traditional media sources (Gerber, Burton-Jeangros, & Dubied, 2011). As far as  
78 spiders are concerned, it has been demonstrated that there is a significant overdiagnosis of spider  
79 bites and envenomation in the medical literature (White, 2003; Bennett & Vetter, 2004; Vetter,  
80 2004; Vetter et al., 2005; Vetter, Hinkle, & Ames, 2009; Stuber & Nentwig, 2016). A recent  
81 major role in spreading falsehoods about spiders could also be associated with traditional and  
82 social media, due to their high efficiency in conveying a message more directly and reaching a  
83 wider audience (Vosoughi, Roy, & Aral, 2018). It is understood how the media play an  
84 important role in the construction and circulation of risk images associated with animals,  
85 contributing to develop fears and ambivalence (Gerber et al., 2011). Yet, while spiders are the  
86 quintessential feared animals, there is still poor understanding of the role of the media in  
87 spreading (mis)information about them (Cushing & Markwell, 2010).

88 Here, we explored the human dimension of spiders in Italy through the lens of traditional  
89 and social media. We examined the media representations of human-spider encounters as  
90 published in Italian online newspapers over the past 10 years, in order to assess the accuracy,  
91 spreading, and sensationalistic content of news. We tackled the following questions:

92

- 93 i) What is the content and quality of the information of each spider-related media report?  
94 ii) What is the temporal distribution of spider-related news?  
95 iii) Which factors determine the effective spreading of news on social media?  
96

97 Our over-arching goal is to understand the potential role of online media in exacerbating  
98 arachnophobic sentiments and promoting a distorted perception of the risk associated with  
99 spider bites. This is important given that these negative sentiments may ultimately lead to  
100 lowering public tolerance towards spiders and reducing conservation efforts towards them  
101 (Knight, 2008; Simaika & Samways, 2018).  
102

## 103 **METHODS**

### 104 **Media report search**

105 We adapted the methodology of Bombieri et al. (2018) for retrieving media reports on human-  
106 spider encounters published in Italian online newspapers (Figure 1a). We carried out online  
107 searches in Italian with *Google news*, choosing multiple keyword combinations. We first  
108 searched for the Italian words for bite (“morso”), followed by spider (“ragno”) and one of the  
109 years between 2010 and 2020 (e.g., “morso ragno 2014”). We repeated the search using the word  
110 sting (“puntura”) instead of bite, given that it is frequently used (incorrectly) by journalists  
111 (among others; see, e.g., Afshari, 2016). We then repeated the search, changing the noun “ragno”  
112 (spider) to the Latin and vernacular names of spider species generally perceived as dangerous in  
113 Italy: *Cheiracantium punctorium* (“Ragno dal sacco giallo”), *Latrodectus tredecimguttatus*  
114 (“Argia”, “Malmignatta”, “Vedova nera”), *Loxosceles rufescens* (“Reclusa”, “Ragno eremita”,  
115 “Ragno violino”), and *Zoropsis spinimana* (“Falsa lcosa”). We compiled the list of species  
116 based on our experience in years of interaction with the staff of the Anti-poison Center in Milan  
117 (Centro Antiveleni) and the San Giovanni Molinette hospital in Turin, who regularly contacted  
118 us asking for expert opinions on spider identification (on average 4.6 requests/month in 2019).

119 This search strategy led to a total of 260 searches: 2 actions (“morso” or “puntura”) x 13  
120 species names (the general words “ragno”, 4 Latin, and 8 vernacular species names) x 10 years  
121 (2010–2020). For each unique keyword search, we checked news up to the final available page  
122 in *Google news*, collecting all the media reports referring to one or more encounters in Italy

123 between humans and spiders. We disregarded: i) media reports which did not mention a specific  
124 locality for the event; ii) media reports referring to spider bite events that occurred outside Italy  
125 (e.g., a report written in Italian but focusing on a spider bite that occurred in England); and iii)  
126 media reports not specifically reporting a spider-human encounter (e.g., news discussing best  
127 practices to deal with a spider bite).

### 128 129 **Media report content**

130 For each media report, we first extracted basic information: a) title, b) date of publication, c)  
131 journal name, and d) journal circulation ('Regional' or 'National'). We classified newspapers  
132 circulation as 'Regional' if their total circulation was below 50,000 copies and as 'National' if it  
133 was above 50,000 copies, using the 2017 Assessment for Press Circulation provided by the  
134 society Accertamenti Diffusione Stampa (ADS) srl. Whenever newspapers were not covered in  
135 this report, we used the information found on each newspaper' webpage.

136 Then we read the full article and scored the e) spider species as it was mentioned in the  
137 media report (even if the species attribution was incorrect based on indirect evidence), f) type of  
138 event ("encounter", "bite", or "deadly bite"), g) year of the event, h) location of the event, i)  
139 presence/absence of photographs of the spider, j) presence/absence of photographs of the bite,  
140 and k) possible mention of an expert-opinion (doctor, arachnologist, or general biologist). Since  
141 several media reports were discussing the same event, we created an identifier for each unique  
142 event ("Event\_ID"), by combining location and year of the event (e.g., "Terni\_2018"). We also  
143 derived WGS84 coordinates for each event location, by geo-referencing the nearest city on  
144 *Google Earth*.

145 Following Nanni et al. (2020), we expressed the success of each media report as its  
146 spreading on social media, using the number of total shares in Facebook. We chose Facebook,  
147 as it is one of the most used social media platforms in Social Science research (e.g., Wilson,  
148 Gosling, & Graham, 2012; Kramer, Guillory, & Hancock, 2014). We extracted Facebook shares  
149 using the API tool available on ShareCount webpage ([www.sharedcount.com](http://www.sharedcount.com); accessed on 2  
150 March 2020). When the number of shares exceeds 999, this tools returns a rounded number (e.g.,  
151 1K for number of shares between 1000 and 1999). In such cases, we used the lowest number  
152 (1000). Even though we compared the number of shares for media reports published in different

153 years, we consider this a reliable approach (see Nanni et al., 2020). Indeed, the share of online  
154 news on social media typically reaches a stable plateau at 30 days after publication (Papworth et  
155 al., 2015).

### 156 157 **Scientific quality of the media reports**

158 We assessed the quality of each media report by checking for the presence/absence of four types  
159 of errors in text and figures:

160 i) errors in photographs, when the photograph(s) of the species in the media report (if any) did  
161 not correspond to the species mentioned in the text, or when the attribution was not possible  
162 (e.g., blurry photographs);

163 ii) errors in systematics and taxonomy, like the common mistake of considering spiders “insects”  
164 (Jambrina, Vacas, & Sánchez-Barbudo, 2010), but also subtle inaccuracies in term of Linnaean  
165 taxonomic ranks [e.g., Report\_ID 271 (translated): “... the ‘*malmignatta*’, a *genus* of Italian  
166 spider belonging to the *family* of the *species* of the black widow”];

167 iii) errors in venom and other physiological or medical aspects or terminology [e.g., Report\_ID  
168 147 (translated): “... the *venom sac* was removed with surgery”]; and

169 iv) errors in morphology and anatomy, such as the frequent “spider sting” instead of “spider bite”  
170 (Afshari, 2016).

171 Each error type was scored as present or absent, thus we did not counted cumulative  
172 errors of the same type in the same report.

### 173 174 **Classification of Sensationalism**

175 Three authors (MI, SM, and VN) independently evaluated the title, subheadings, and main text of  
176 each media report, and assessed it as overstated (sensationalistic) or not (neutral). We took the  
177 consensus between the three independent evaluations to minimize the effect of subjectivity.  
178 Sensationalism in animal-related media reports is often associated with emotional words and  
179 expressions (Bombieri et al., 2018; Nanni et al., 2020). In our case, frequent words associated  
180 with sensationalistic content were alarm (“allarme”), agony (“agonia”), attack (“attacco”), devil  
181 (“diavolo”), fear (“paura”), hell (“inferno”), killer (“assassino”), nightmare (“incubo”), panic  
182 (“panico”), terrible (“terribile”), and terror (“terrore”). Examples of titles (literally translated

183 from Italian) of sensationalistic versus non sensationalistic media reports focusing on the same  
184 Event\_ID are, respectively: i) “[...] Sardinia and the nightmare of venomous spiders” versus  
185 “Black widow spider spotted in Sardinia, but the expert is happy: it is an indicator of  
186 biodiversity”; ii) “Alarm in Rome: Violin spiders strike again and again. Boom of  
187 hospitalisations” versus “Bitten by a violin spider, he was immediately hospitalized”; or iii)  
188 “Attacked by a violin spider, traffic warden miraculously survived” versus “Be aware of the  
189 violin spider: if it bites you, it can be dangerous”.

## 191 **Data analysis**

192 We conducted all analyses in R (R Core Team, 2018). We graphically explored the content of  
193 media reports with barcharts and boxplots with ‘ggplot2’ (Wickham, 2016). For the two most  
194 abundant species, *Latrodectus tredecimguttatus* and *Loxosceles rufescens*, we explored temporal  
195 distribution of media reports using density plot, by computing a kernel density estimate with a  
196 1.5 bandwidth adjustment for both the annual and monthly distribution of media reports  
197 (Wickham, 2016). For this and the following analysis, we excluded media reports published in  
198 2020 given this year was covered only up to February.

199 We used generalized linear mixed models (GLMM) to explore the factors driving the  
200 share of news on Facebook. We followed Zuur & Ieno’s (2016) protocol for presenting  
201 regression-type analyses, whereby we: i) conducted data exploration and identified the  
202 dependency structure in the data; ii) explained, fitted, and validated the regression models; and  
203 iii) interpreted the regression output and presented the main effect plots.

204 The data exploration revealed the presence of four outliers in the number of shares,  
205 namely media reports shared over 15,000 times on Facebook. We removed these four  
206 observation from the database. Furthermore, we observed that 39.5% of media reports were  
207 never shared on Facebook (Figure 2b). However, since these are “true zeros” (*sensu* Blasco-  
208 Moreno, Pérez-Casany, Puig, Morante, & Castells, 2019), we did not apply zero-inflated models.

209 We fitted GLMMs with ‘glmmADMB’ (Fournier et al., 2012), starting from an initial  
210 structure that included all covariates and random terms of interest:



212 Share ~ Event type + Circulation + Year + Month + Month<sup>2</sup> + Sensationalism + Species + Figure (species) + Figure  
213 (bite) + Expert opinion + random(Newspaper) + random(ID\_event) (*Eq. 1*; in R notation)

214  
215 The random factor ‘Newspaper’ was introduced because reports published in the same  
216 newspaper usually share a similar language, style, and graphical elements. The random factor  
217 ‘Event\_ID’ was introduced to take into account the fact that multiple reports in our dataset  
218 discussed the same events. We included the square of month (term month<sup>2</sup>) to capture a possible  
219 seasonal response of the shares during the year (i.e., a quadratic relationship between shares and  
220 month).

221 The numbers of Facebook shares are counts, so we initially chose a Poisson distribution.  
222 The Poisson GLMM was, however, highly over-dispersed ( $\chi^2$ : 227751553743;  $p < 0.001$ ) and so  
223 we switched to a negative binomial distribution. Once the initial model had been fitted, we  
224 performed a step-wise model selection in ‘MuMIn’ (Bartoń, 2019). We based the model  
225 reduction on Akaike Information Criterion (AIC) and Akaike weights [ $w_i(\text{AIC})$ ] (Burnham &  
226 Anderson, 2004), in order to simplify the model and avoid overfitting (Hawkins, 2004).

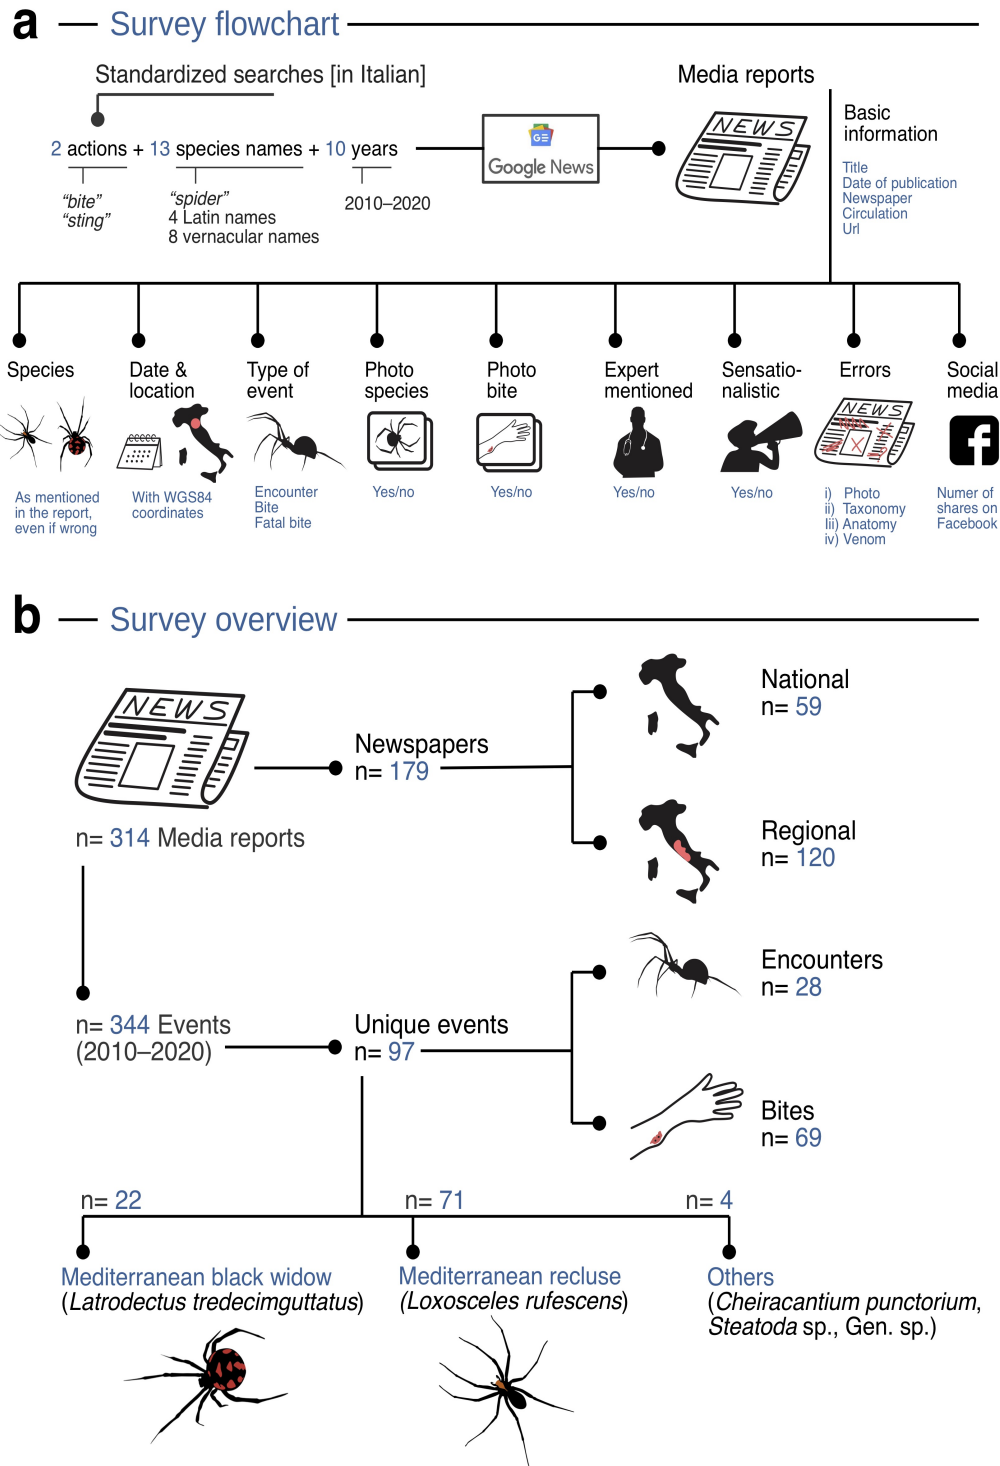

228

**Figure 1. Infographic illustrating the study design and summary statistics: a)** flowchart of the general methodology for retrieving media reports and mining relevant information; **b)** survey summary statistics.

229

## 230 RESULTS

### 231 Content of media reports

232 We collected and analysed 314 media reports published between 2010 and 2020, discussing 344  
233 spider-related events attributable to 97 unique events (Figure 1b). The average ( $\pm$ s.d.) number of  
234 media reports discussing each event was  $3.52 \pm 6.72$  (range 1–33). The two most discussed  
235 events were i) the story of a traffic warden from Terni who was supposedly bitten by a  
236 Mediterranean recluse spider in 2018, covered by 33 media reports; and ii) the story of a woman  
237 supposedly bitten in 2019 by a Mediterranean recluse spider while sunbathing in Collecchio,  
238 covered by 31 media reports. All other events were covered by 20 media reports or fewer.

239 Most media reports focused on *Loxosceles rufescens* (n= 230; 66.9%) and *Latrodectus*  
240 *tredecimguttatus* (n= 97; 27.3%). Other species – *Cheiracanthium punctorium* (n= 14), *Steatoda*  
241 sp. (n= 4), and unidentified (n= 2) – were poorly represented (5.8%) and so we merged these  
242 under the category “Others”. Reports on *L. tredecimguttatus* mostly discussed human-spider  
243 encounters (Figure 2a), e.g., a farmer spotting a black widow while working in his field or a  
244 tourist photographing the species during a hike. Conversely, reports on *L. rufescens* mostly  
245 referred to bites (real or otherwise), including three unverified fatal cases (see discussion). Most  
246 media reports contained one or more photographs of the species (n= 298; 86.6%; Figure 2c),  
247 whereas only ca. 10% of media reports contained photographs of the bite (n= 33) (Figure 2d).  
248 Expert were sporadically mentioned in media reports (Figure 2e) and sensationalistic contents  
249 were more frequent in media reports referring to *L. rufescens* rather than other species (Figure  
250 2f).

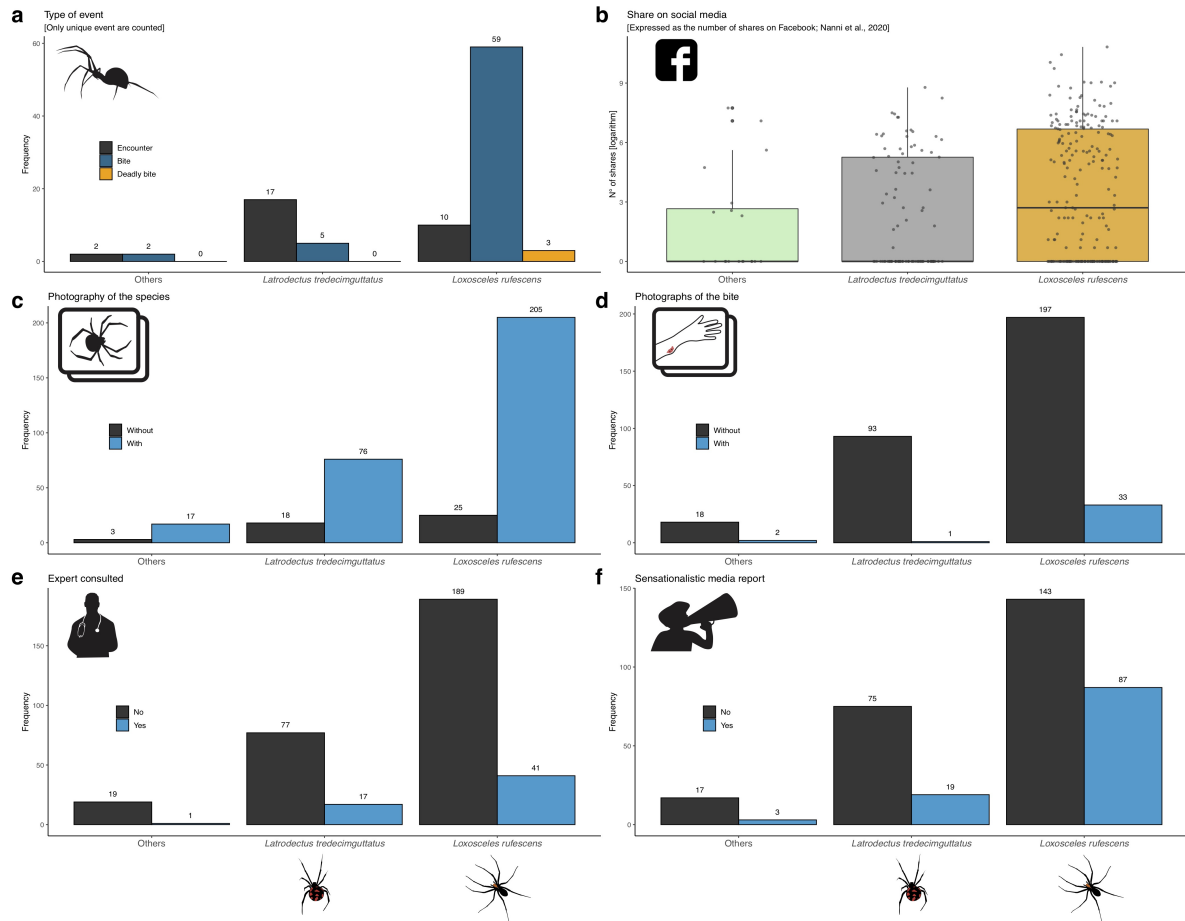

252 **Figure 2. Content of media reports:** a) Type of event covered by media reports focusing on *Latrodectus*  
 253 *tredecimguttatus*, *Loxosceles rufescens*, and other species. b) Logarithm of total number of shares on Facebook  
 254 (the grey dots are jittered observed values, whereas the boxplots summarize median, quantiles, and range).  
 255 c) Frequency of species photographs in media reports. d) Frequency of bite photographs in media reports.  
 256 e) Frequency of expert consultancy in media reports. f) Frequency of sensationalistic versus non-sensationalistic  
 257 media reports.

258 **Quality of media reports**

259 One or more error types were present in 73% of media reports (Figure 3). The distribution of  
260 errors varied, however, depending on the species: most media reports referring to *L.*  
261 *tredecimguttatus* and other species contained no errors, whereas most reports on *L. rufescens*  
262 contained one or more errors (Figure 3a). The most frequent errors referred to spider morphology  
263 and anatomy (55.3%), species photographs (28.4%), and systematics and taxonomy (25.8%).  
264 Errors referring to venom and other physiological aspects were present in 15% of media reports  
265 (Figure 3b–e).

266

267 **Temporal distribution of media reports**

268 We observed a strong temporal signal in the distribution of media reports between 2010 and  
269 2019, with a recent increase in the number of news for both species, which was rather steadily  
270 increasing in *L. tredecimguttatus* and almost exponential in *L. rufescens* (Figure 4a). From a  
271 seasonal point of view (Figure 4b), we found that there was a clear summer peak, in July, in the  
272 frequency of reports for both species. This seasonal pattern was more evident for reports  
273 referring to *L. tredecimguttatus*.

274

275 **Factors affecting the sharing of media reports on social media**

276 The model that minimized AIC included year and sensationalism as fixed terms (Table 1).  
277 Random effect variance ( $\pm$  s.e.) was  $6.55 \pm 3.56$  for Newspaper and  $3.24 e^{-5} \pm 0.01$  for Event\_ID.  
278 We found a significant positive effect of the year of publication, with recent media reports being,  
279 on average, more frequently shared on social media (Figure 5a). Furthermore, media reports with  
280 sensationalistic content were, on average, more frequently shared on social media (Figure 5b).  
281 All other factors had no significant influence on sharing on social media, and were discarded  
282 during model selection (Table 1).

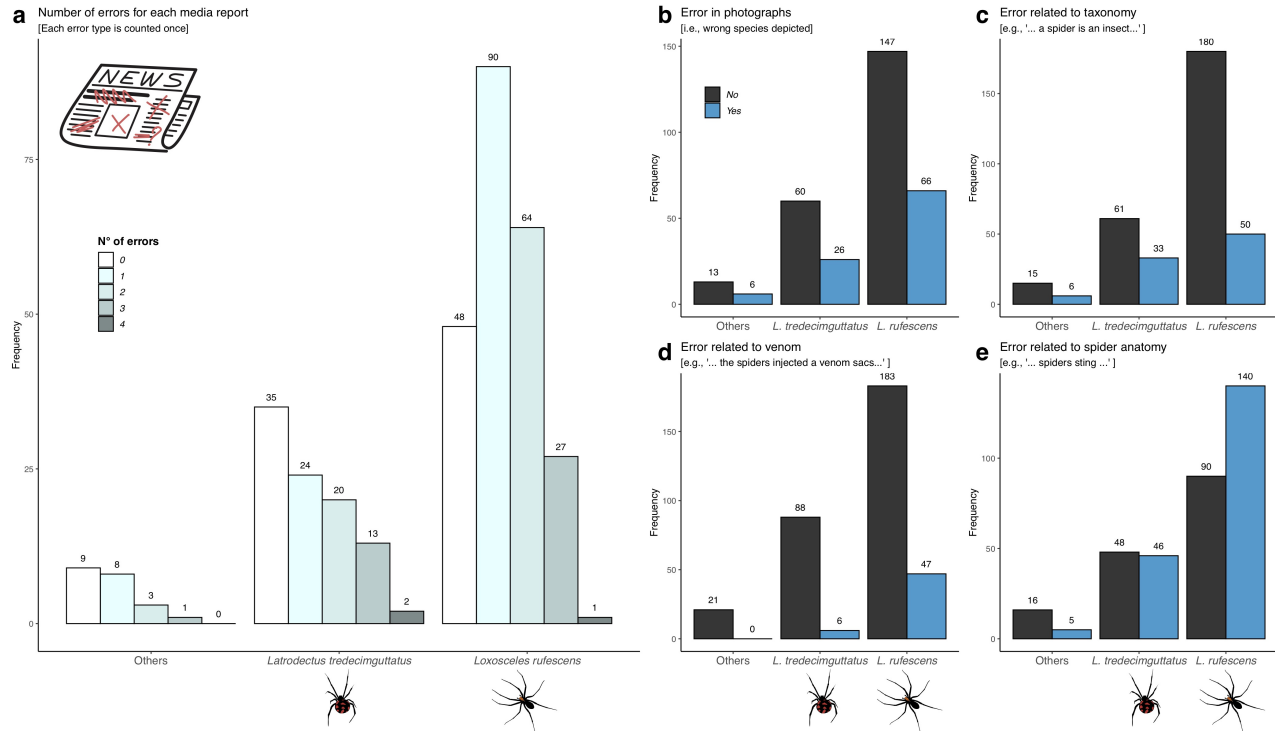

284 **Figure 3. Quality of media reports:** a) Total number of error for media reports focusing on *Latrodectus*  
 285 *tredecimguttatus*, *Loxosceles rufescens*, and other species.  
 286

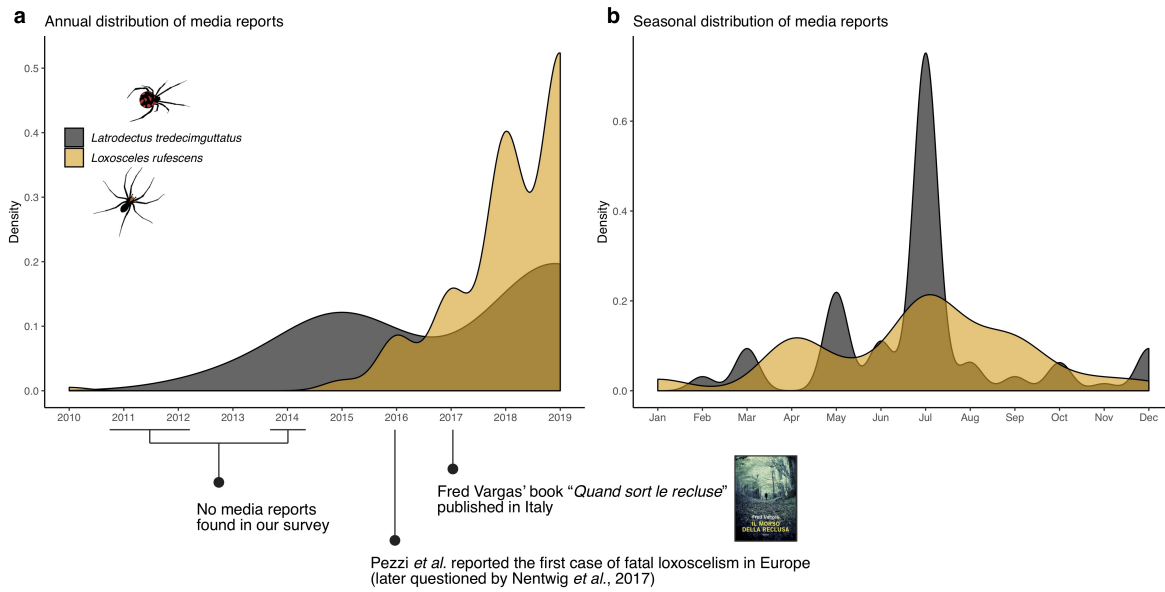

288 **Figure 4. Temporal distribution of media reports:** The cumulative curves for media reports referring to  
289 *Latrodectus tredecimguttatus* and *Loxosceles rufescens* are estimated with a kernel density. **a)** Annual distribution of  
290 media reports between 2010 and 2019. Few remarks are highlighted on the x-axis (see Discussion for details). **b)**  
291 Monthly distribution of media reports (cumulative of all years).

292

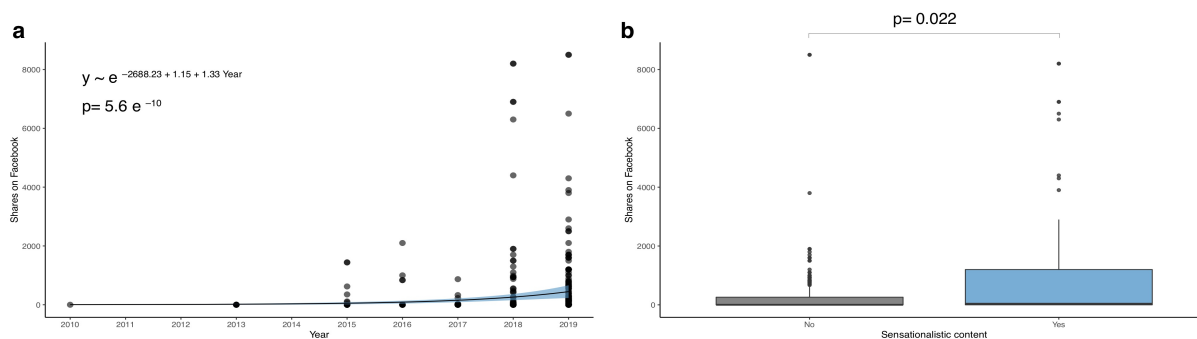

294 **Figure 5. Factors driving the spreading of media reports on social media:** The results are based on the most  
295 appropriate generalised linear mixed model (see Table 1 for model selection and estimated regression parameters).  
296 **a)** Predicted relationship between the number of Facebook shares and the year of publication of the media report.  
297 To generate the prediction, the effect of all factorial terms was summed to the intercept. **b)** Boxplots showing the  
298 difference between number of Facebook shares in neutral versus sensationalistic media reports.



299  
300  
301

**Table 1. Result of model selection and estimated regression parameters.** Estimated regression parameters (Estimated  $\beta \pm$  S.E.) for fixed terms are given only for the selected model.

| Competing models                                                                                                                            | Estimated $\beta \pm$ S.E. | p                    | df | AIC     | $\Delta$ AIC | $w_i$ |
|---------------------------------------------------------------------------------------------------------------------------------------------|----------------------------|----------------------|----|---------|--------------|-------|
| Intercept                                                                                                                                   | -2688.36 $\pm$ 434.44      | -                    | 6  | 3057.76 | 0.0          | 0.414 |
| Year                                                                                                                                        | 1.33 $\pm$ 0.22            | 5.6 e <sup>-10</sup> |    |         |              |       |
| Sensationalism                                                                                                                              | 1.15 $\pm$ 0.50            | 0.02                 |    |         |              |       |
| Circulation + Year + Sensationalism                                                                                                         | -                          | -                    | 7  | 3059.16 | 1.40         | 0.206 |
| Circulation + Year + Sensationalism + Expert opinion                                                                                        | -                          | -                    | 8  | 3059.72 | 1.96         | 0.156 |
| Circulation + Year + Sensationalism + Figure (bite) + Expert opinion                                                                        | -                          | -                    | 9  | 3060.40 | 2.64         | 0.111 |
| Circulation + Year + Sensationalism + Figure (species) + Figure (bite) + Expert opinion                                                     | -                          | -                    | 10 | 3061.48 | 3.72         | 0.065 |
| Circulation + Year + Sensationalism + Species + Figure (species) + Figure (bite) + Expert opinion                                           | -                          | -                    | 11 | 3063.16 | 5.40         | 0.028 |
| Event type + Circulation + Year + Sensationalism + Species + Figure (species) + Figure (bite) + Expert opinion                              | -                          | -                    | 12 | 3064.68 | 6.92         | 0.013 |
| Event type + Circulation + Year + Month + Month <sup>2</sup> + Sensationalism + Species + Figure (species) + Figure (bite) + Expert opinion | -                          | -                    | 14 | 3065.66 | 7.90         | 0.008 |

302  
303  
304

AIC= Aikaie Information Criterion;  $\Delta$ AIC= (AIC of the model – AIC of the best model); df= Degrees of freedom; p= *p*-value;  $w_i$ = Aikaie weights.

## DISCUSSION

### Content of media reports and temporal distribution

We found that the quality of online newspaper articles focusing on spiders in Italy is, in general, rather poor. Media report quality appears to be independent of the newspaper's circulation (national versus regional). Over 70% of media reports contained errors, 32% were characterized by an overstated content, and in virtually none of them was an expert consulted or interviewed. The two most represented species in the media reports were *Latrodectus tredecimguttatus* and *L. rufescens*, two species widely distributed in Italy (Pantini & Isaia, 2019). These two species belong to the only globally distributed genera responsible for medically important clinical syndromes, namely latrodectism and loxoscelism (Isbister & Fan, 2011). The fact that these species can deliver potentially harmful bites to humans seemingly explains why they are able to attract this great attention from the media.

*Loxosceles rufescens* is native to the Mediterranean basin (Planas, Saupe, Lima-Ribeiro, Peterson, & Ribera, 2014), but has been introduced to many areas of the world where it is considered an important invasive species (Nentwig, Pantini, & Vetter, 2017; Taucare-Rios, Nentwig, Bizama, & Bustamante, 2018). The Mediterranean recluse is a rather common inhabitant of natural and in-door habitats in Italy and thus, it seems likely that it has been coexisting with humans for centuries. Indeed, the species has been known in Italy since the second half of the XIX century, when the first catalogue on Italian spiders was published (Canestrini & Pavesi, 1868). According to scientific literature on Italian spiders (Pantini & Isaia, 2019), records of *L. rufescens* in indoor habitats have been increasing since 2000, with only one record before 1900, four between 1960 and 2000, and seven after 2000. Yet, the species began appearing in the media spotlight only in the past five years (Figure 4a). The increase of reports, often of poor quality and with a highly sensationalistic content, started just after the publication of the first supposed case of fatal loxoscelism in Europe (Pezzi et al., 2016; see discussion later). Coincidentally, this increase also came after the publication in Italy of *Quand sort la recluse*, a crime novel by Fred Vargas, where Chief inspector Jean-Baptiste Adamsberg has to deal with a series of murders committed using the venom of *L. rufescens*. While there is probably no causal relationship between these events and the increase in number of reports, it is interesting to note that several recent media reports in our database referenced both sources.

335 The quality of media reports referring to *L. tredecimguttatus* was better, and fewer  
336 reports had a sensationalistic content. *Latrodectus tredecimguttatus* was described based on  
337 specimens collected in Volterra (Tuscany). The species is distributed across a wide area in the  
338 Palearctic region, from the Mediterranean basin to Ukraine, Caucasus, Central Asia, and China  
339 (World Spider Catalog, 2020). In Italy, as well as in most in most other countries, the  
340 Mediterranean black widow is preferably found in ruderal areas of agricultural land and, just like  
341 *L. rufescens*, has been living close to humans for centuries. However, according to the data  
342 presented in scientific literature, its presence in strictly indoor habitats is infrequent – only 2  
343 records out of the 23 available describing habitats (Pantini & Isaia, 2019). According to scientific  
344 literature on Italian spiders (Pantini & Isaia, 2019), most records of this species refer to natural or  
345 semi-natural (agricultural) habitats and only in one case (Pepe, 2005) has the species been  
346 reported in synanthropic habitats. The Mediterranean black widow began appearing in the media  
347 spotlight only in the past ten years (Figure 4a), with the highest number of media reports from  
348 late spring to early autumn, paralleling the period of highest activity of the species (Nentwig et  
349 al., 2020) and corresponding to the higher possibility of human-spider encounters. Given that  
350 most media reports on *L. tredecimguttatus* were in fact ‘Encounters’ (Figure 2a), namely reports  
351 of the species’ presence as provided by readers of the different newspapers, the distribution of  
352 news may be somehow tracking the species’ phenology, making it an unusual example of  
353 iEcology (Jarić et al., 2020).

354 We found that the risk scenario depicted by the media reports was unnecessarily alarmist,  
355 especially with regard to *L. rufescens*. First, no proven fatality due to a bite by *L. rufescens* has  
356 occurred globally (Nentwig et al., 2017). Second, overdiagnosis of spider bites is a rather  
357 common phenomenon for “popular” taxa such as *Loxosceles* and *Latrodectus* (Stuber &  
358 Nentwig, 2016). A conservative estimate would suggest that less than 10% of the bites reported  
359 in the media reports analysed here were delivered by the species described in the report (see  
360 Suchard, 2011). Third, in virtually none of the media reports is it written that the biting spider  
361 was brought to a hospital for identification, thus the causal attribution remains unconfirmed and  
362 merely suspected (Vetter & Isbister, 2008). Accordingly, the content of the majority of media  
363 reports analysed here has to be taken at best as anecdotic.

364           These considerations apply also to the three casualties associated with a bite by *L.*  
365 *rufescens* reported in the media reports. The only scientifically supported fatality refers to a case  
366 of loxoscelism in a woman, 65, dating back to 2015. This event was discussed in the medical  
367 literature (Pezzi et al., 2016), and later began to be mentioned by some journalists (n=7 media  
368 reports). However, the validity of this medical report was readily questioned by Nentwig et al.  
369 (2017), because the identity of the spider biting the woman was not ascertained. Allegedly:  
370 “[*The woman*] was bitten the evening before hospitalization while cleaning the home cellar by a  
371 spider, which, from the description and place where the bite occurred, could probably be  
372 identified as the *Loxosceles rufescens species*” (Pezzi et al., 2016). Two other fatalities covered  
373 in the media reports – Cagliari (2017) and Aosta (2020) – are unverifiable, and most likely  
374 wrong, given that neither was the bite ascertained nor was the spider collected and identified.  
375 The validity of these reports was even questioned in some newspapers, for example Report\_ID  
376 229 stating that “*The story of the men who died due to a violin spider bite is probably fake*  
377 *news*”, or Report\_ID 115 observing that “... he died three months after being stung [bitten] by a  
378 violin spider. But the cause of his death could be another” (titles literally translated).

379           The seasonal pattern in the distribution of news with a marked summer peak (Figure 4b),  
380 parallels what was found by Cushing & Markwell (2010) when analysing newspapers articles on  
381 the Australian endemic Sydney funnel-web spider (*Atrax robustus*). The higher prevalence of  
382 secondary news during the summer holidays is a well known trend in journalism whereby, in the  
383 absence of more relevant news, a secondary subject such as a spider bite is frequently able to  
384 make it to the front pages.

### 385 386 **Social media amplification of sensationalistic contents**

387 Social media have profoundly shaped the way information is produced and circulated. In recent  
388 years, social media platforms have become an important battlefield for political debates (Hall,  
389 Tinati, & Jennings, 2018), as well as the primary digital environments where people inform  
390 themselves and frame their perception of the world (Weeks, Ardèvol-Abreu, & Gil de Zúñiga,  
391 2015). In parallel, social media have also become the preferential channel through which  
392 traditional news are disseminated and discussed (Lee & Ma, 2012), with most newspapers now

393 actively using social media platforms such as Facebook and Twitter to spread their online  
394 contents more effectively (Ju, Jeong, & Chyi, 2014)

395 In line with this, we found that the share of spider-related news on social media has  
396 increased significantly in recent years (Figure 5a). In the contemporary era, where “*more*  
397 *iPhones are sold in a few days than there are tigers, elephants, and gorillas on the planet*”  
398 (Chapron, Levrel, Meinard, & Courchamp, 2018: p. 651), this result did not come as a surprise.  
399 However, not all news on spiders were shared with the same frequency online. While  
400 sensationalistic reports represent only about one third of the total media reports analysed in this  
401 survey, these were on average shared on Facebook two to three times more than neutral news  
402 (Figure 5b). This results is in accordance with general studies demonstrating that newspaper  
403 articles with content evoking strong positive or negative emotions are more likely to become  
404 viral (Berger & Milkman, 2012). Being shared on social media, sensationalistic news will  
405 inevitably be more widely read. Due to their sensationalistic content, they are also more likely to  
406 remain imprinted in a reader’s memory, especially in an arachnophobic reader’s, since it has  
407 been demonstrated that arachnophobics recall spider-relevant information more effectively  
408 (Smith-Janik & Teachman, 2008). On top of this, social media platforms are a fertile ground for  
409 emotional contagion, the phenomenon whereby emotional states are rapidly transferred to others  
410 leading to massive-scale emotional homogenisation (Kramer et al., 2014). This may contribute to  
411 empowering a biased perception of risk (Gerber et al., 2011) and facilitate the persistence of  
412 arachnophobic sentiments.

#### 413 414 **Significance of results for spider conservation**

415 Fear of spiders is one of the most prevalent animal-related phobias in humans (Mammola et al.,  
416 2017) and thus, spider-related contents are an effective emotional trigger (Smith-Janik &  
417 Teachman, 2008). We have shown how some journalists are able to exploit arachnophobic  
418 sentiments to their advantage, framing sensationalistic news capable of attracting substantial  
419 online attention. Sensationalistic news that dramatize and overstate the frequency of spiders  
420 “attacks” on humans are also those which most attract social media. Through emotional  
421 contagion, this biased representation is spread online. Ultimately, this may result in lowering

422 public tolerance for spiders and lead to lower willingness for conservation and management  
423 efforts.

424 As demonstrated by Knight (2008), aesthetic and positive/negative features of animals  
425 correlate to the protection each taxon receives. Accordingly, the main challenges facing  
426 invertebrate conservationists is to change the perceived negative connotations of invertebrates by  
427 the public (Samways et al., 2020), raising awareness about the importance of these often  
428 uncharismatic organisms for the correct functioning of ecosystems (Cardoso et al., 2020).  
429 Spiders are apical predators in the invertebrate food web (Nyffeler & Birkhofer, 2017), while  
430 also representing a fundamental source of food for other organisms, such as birds. The  
431 importance of spiders has been even valued in economic terms, given that many species act as  
432 major biocontrol for pests in agroecosystem (Cotes et al., 2018; Michalko, Pekar, & Entling,  
433 2019; Michalko, Pekár, Dul'a, & Entling, 2019), and their body structures, silk, and venom are  
434 constant sources for bio-inspired materials and engineering solutions (Hinman, Jones, & Lewis,  
435 2000; Heim, Keerl, & Scheibel, 2009; Kang et al., 2014), as well as pharmaceutical products  
436 (Saez et al., 2010; Moore, Leung, Norton, & Cochran, 2013). Nevertheless, spiders are still  
437 largely underrepresented in global and regional conservation policies, particularly when  
438 compared to vertebrates (Leather, 2013; Davies et al., 2018; Fukushima, Mammola, & Cardoso,  
439 2020) or charismatic insects such as butterflies and dragonflies (Milano et al., in prep.). In  
440 Europe, for example, spiders are almost entirely absent from international and national  
441 conservation policies, as well as from Italian legislation (Milano, Pantini, Mammola, & Isaia,  
442 2017).

443 Traditional media have the potential to play an important role in changing the *status quo*,  
444 by offering the public unbiased representations of spiders. Thus, we urge journalists to renew  
445 their efforts toward objectivity and accuracy, which are best achieved by i) consulting and  
446 interviewing experts; ii) referring to scientific literature, as well as to modern online  
447 resources led by expert arachnologists (see, e.g., the “*Recluse or Not?*” project on Twitter;  
448 [@RecluseOrNot](#)); and iii) avoiding unmotivated sensationalism when describing biting events.

449 The traditional media arguably remain among the most powerful communication tools,  
450 capable of delivering their message effectively especially thanks to the aid of social media (Ju et  
451 al., 2014). If this potential is harnessed to the goal of delivering accurate information to the

452 public at large (Papworth et al., 2015), this would facilitate the much-needed transition toward an  
453 unbiased protection of the diversity of life.

454

#### 455 **Acknowledgements**

456 Diego Fontaneto provided valuable suggestions. Special thanks are due to Stephen Cooper for  
457 proof-reading the English.

458

#### 459 **Author contribution statement**

460 Conceptualization: SM;

461 Data management: SM, VN, PP, and MI;

462 Data analysis: SM;

463 Writing, first draft: SM;

464 Writing, revisions: VN, PP, MI.

465

#### 466 **Data availability statement**

467 Data supporting this study will be deposited in a public online repository upon acceptance.

468

#### 469 **Conflict of interest statement**

470 None declared.



## LITERATURE CITED

- 471  
472  
473 Afshari, R. (2016). Bite like a spider, sting like a scorpion. *Nature*, 537(167). doi:10.1038/537167e
- 474 Bartoń, K. (2019). MuMIn: Multi-Model Inference.
- 475 Bennett, R. G., & Vetter, R. S. (2004). An approach to spider bites. Erroneous attribution of dermonecrotic lesions  
476 to brown recluse or hobo spider bites in Canada. *Canadian Family Physician*, 50, 1098–1101.
- 477 Berger, J., & Milkman, K. L. (2012). What Makes Online Content Viral? *Journal of Marketing Research*, 49(2),  
478 192–205. doi:10.1509/jmr.10.0353
- 479 Bertone, M. A., Leong, M., Bayless, K. M., Malow, T. L. F., Dunn, R. R., & Trautwein, M. D. (2016). Arthropods  
480 of the great indoors: characterizing diversity inside urban and suburban homes. *PeerJ*, 4, e1582.  
481 doi:10.7717/peerj.1582
- 482 Blasco-Moreno, A., Pérez-Casany, M., Puig, P., Morante, M., & Castells, E. (2019). What does a zero mean?  
483 Understanding false, random and structural zeros in ecology. *Methods in Ecology and Evolution*, 10(7), 949–  
484 959. doi:10.1111/2041-210X.13185
- 485 Bombieri, G., Nanni, V., Delgado, M. del M., Fedriani, J. M., López-Bao, J. V., Pedrini, P., & Penteriani, V. (2018).  
486 Content Analysis of Media Reports on Predator Attacks on Humans: Toward an Understanding of Human  
487 Risk Perception and Predator Acceptance. *BioScience*, 68(8), 577–584. doi:10.1093/biosci/biy072
- 488 Burnham, K. P., & Anderson, D. R. (2004). *Multimodel inference: A Practical Information-Theoretic Approach*.  
489 (Springer-Verlag, Ed.), *Sociological Methods and Research*. New York. doi:10.1177/0049124104268644
- 490 Canestrini, G., & Pavesi, P. (1868). Araneidi italiani. *Atti Della Società Italiana Di Scienze Naturali, Milano*, 11(3),  
491 738–872.
- 492 Cardoso, P., Barton, P. S., Birkhofer, K., Chichorro, F., Deacon, C., Fartmann, T., ... Samways, M. J. (2020).  
493 Scientists' warning to humanity on insect extinctions. *Biological Conservation*, 242, 108426.  
494 doi:10.1016/J.BIOCON.2020.108426
- 495 Cavell, M. (2018). Arachnophobia and early english literature. In L. Ashe, P. Knox, D. Lawton, & W. Scase (Eds.),  
496 *New Medieval Literature* (pp. 1–44). Cambridge: D.S. Brewer.
- 497 Chapron, G., Levrel, H., Meinard, Y., & Courchamp, F. (2018). A Final Warning to Planet Earth. *Trends in Ecology*  
498 *& Evolution*, 33(9), 651–652. doi:10.1016/j.tree.2017.12.010
- 499 Cotes, B., Gonzalez, M., Benitez, E., De Mas, E., Clemente-Orta, G., Campos, M., & Rodriguez, E. (2018). Spider  
500 Communities and Biological Control in Native Habitats Surrounding Greenhouses. *INSECTS*, 9(1).  
501 doi:10.3390/insects9010033
- 502 Cushing, N., & Markwell, K. (2010). 'Watch out for these KILLERS!': newspaper coverage of the Sydney funnel  
503 web spider and its impact on antivenom research. *Health and History*, 12(2), 79–96.
- 504 Davey, G. C. L. (1994). The 'Disgusting' Spider: The Role of Disease and Illness in the Perpetuation of Fear of  
505 Spiders. *Society & Animals*, 2(1), 17–25.



- 506 Davey, G. C. L., McDonald, A. S., Hirisave, U., Prabhu, G. G., Iwawaki, S., Jim, C. I., ... C. Reimann, B. (1998). A  
507 cross-cultural study of animal fears. *Behaviour Research and Therapy*, 36(7–8), 735–750. doi:10.1016/S0005-  
508 7967(98)00059-X
- 509 Davies, T., Cowley, A., Bennie, J., Leyshon, C., Inger, R., Carter, H., ... Gaston, K. (2018). Popular interest in  
510 vertebrates does not reflect extinction risk and is associated with bias in conservation investment. *PLOS ONE*,  
511 13(9), e0203694. Retrieved from <https://doi.org/10.1371/journal.pone.0203694>
- 512 DeLoache, J. S., Pickard, M. B., & LoBue, V. (2010). How very young children think about animals. In *How*  
513 *animals affect us: Examining the influences of human–animal interaction on child development and human*  
514 *health*. doi:10.1037/12301-004
- 515 Diaz, J. H., & Leblanc, K. E. (2007). Common spider bites. *American Family Physician*, 75(6), 869–873.
- 516 Drijfhout, M., Kendal, D., & Green, P. T. (2020). Understanding the human dimensions of managing overabundant  
517 charismatic wildlife in Australia. *Biological Conservation*, 244, 108506. doi:10.1016/J.BIOCON.2020.108506
- 518 Fournier, D. A., Skaug, H. J., Ancheta, J., Ianelli, J., Magnusson, A., Maunder, M. N., ... Sibert, J. (2012). AD  
519 Model Builder: Using automatic differentiation for statistical inference of highly parameterized complex  
520 nonlinear models. *Optimization Methods and Software*, 27, 233–249. doi:10.1080/10556788.2011.597854
- 521 Frank, J., Johansson, M., & Flykt, A. (2015). Public attitude towards the implementation of management actions  
522 aimed at reducing human fear of brown bears and wolves. *Wildlife Biology*, 21, 122–130.  
523 doi:10.2981/wlb.13116
- 524 Franklin, A., & White, R. (2001). Animals and modernity: Changing human–animal relations, 1949–98. *Journal of*  
525 *Sociology*, 37(3), 219–238. doi:10.1177/144078301128756319
- 526 Fukushima, C. S., Mammola, S., & Cardoso, P. (2020). Global wildlife trade permeates the Tree of Life. *Biological*  
527 *Conservation*, in press. doi:10.1016/j.biocon.2020.108503
- 528 Gerber, D. L. J., Burton-Jeangros, C., & Dubied, A. (2011). Animals in the media: New boundaries of risk? *Health,*  
529 *Risk and Society*, 13(1), 17–30. doi:10.1080/13698575.2010.540646
- 530 Gerdes, A. B. M., Uhl, G., & Alpers, G. W. (2009). Spiders are special: fear and disgust evoked by pictures of  
531 arthropods. *Evolution and Human Behavior*, 30(1), 66–73. doi:10.1016/J.EVOLHUMBEHAV.2008.08.005
- 532 Hall, W., Tinati, R., & Jennings, W. (2018). From Brexit to Trump: Social media’s role in democracy. *Computer,*  
533 51(1), 18–27. doi:10.1109/MC.2018.1151005
- 534 Hathaway, R. S., Bryant, A. E. M., Draheim, M. M., Vinod, P., Limaye, S., & Athreya, V. (2017). From fear to  
535 understanding: Changes in media representations of leopard incidences after media awareness workshops in  
536 mumbai, India. *Journal of Urban Ecology*, 3(1), jux009. doi:10.1093/jue/jux009
- 537 Hauke, T. J., & Herzig, V. (2017). Dangerous arachnids—Fake news or reality? *Toxicicon*, 138, 173–183.  
538 doi:10.1016/J.TOXICON.2017.08.024
- 539 Hawkins, D. M. (2004). The Problem of Overfitting. *Journal of Chemical Information and Computer Sciences*, 44,  
540 1–12. doi:10.1021/ci0342472
- 541 Heim, M., Keerl, D., & Scheibel, T. (2009). Spider silk: From soluble protein to extraordinary fiber. *Angewandte*  
542 *Chemie - International Edition*, 48(20), 3584–3596. doi:10.1002/anie.200803341

- 543 Hicks, J. R., & Stewart, W. P. (2018). Exploring potential components of wildlife-inspired awe. *Human Dimensions*  
544 *of Wildlife*, 23(3), 293–295. doi:10.1080/10871209.2018.1419518
- 545 Hinman, M. B., Jones, J. A., & Lewis, R. V. (2000). Synthetic spider silk: A modular fiber. *Trends in*  
546 *Biotechnology*, 18(9), 374–379. doi:10.1016/S0167-7799(00)01481-5
- 547 Isbister, G. K., & Fan, H. W. (2011). Spider bite. *The Lancet*, 378, 2039–2047. doi:10.1016/S0140-6736(10)62230-  
548 1
- 549 Jacobs, M. H. (2009). Why Do We Like or Dislike Animals? *Human Dimensions of Wildlife*, 14(1), 1–11.  
550 doi:10.1080/10871200802545765
- 551 Jacobs, M. H. (2012). Human Emotions Toward Wildlife. *Human Dimensions of Wildlife*, 17(1), 1–3.  
552 doi:10.1080/10871209.2012.653674
- 553 Jambrina, C. U., Vacas, J. M., & Sánchez-Barbudo, M. (2010). Preservice teachers' conceptions about animals and  
554 particularly about spiders. *Electronic Journal of Research in Educational Psychology*, 8(2), 787–814.
- 555 Jarić, I., Correia, R. A., Brook, B. W., Buettel, J. C., Courchamp, F., Di Minin, E., ... Roll, U. (2020). iEcology:  
556 Harnessing Large Online Resources to Generate Ecological Insights. *Trends in Ecology & Evolution*.  
557 doi:<https://doi.org/10.1016/j.tree.2020.03.003>
- 558 Jones, S. (2006). A political ecology of wildlife conservation in Africa. *Review of African Political Economy*,  
559 33(109), 483–495. doi:10.1080/03056240601000911
- 560 Ju, A., Jeong, S. H., & Chyi, H. I. (2014). Will Social Media Save Newspapers?: Examining the effectiveness of  
561 Facebook and Twitter as news platforms. *Journalism Practice*, 8, 1–17. doi:10.1080/17512786.2013.794022
- 562 Kang, D., Pikhitsa, P. V., Choi, Y. W., Lee, C., Shin, S. S., Piao, L., ... Choi, M. (2014). Ultrasensitive mechanical  
563 crack-based sensor inspired by the spider sensory system. *Nature*, 516(7530), 222–226.  
564 doi:10.1038/nature14002
- 565 Knight, A. J. (2008). 'Bats, snakes and spiders, Oh my!' How aesthetic and negativistic attitudes, and other concepts  
566 predict support for species protection. *Journal of Environmental Psychology*, 28(1), 94–103.  
567 doi:10.1016/j.jenvp.2007.10.001
- 568 Knopff, A. A., Knopff, K. H., & St. Clair, C. C. (2016). Tolerance for cougars diminished by high perception of  
569 risk. *Ecology and Society*, 21, 33. doi:10.5751/ES-08933-210433
- 570 Kramer, A. D. I., Guillory, J. E., & Hancock, J. T. (2014). Experimental evidence of massive-scale emotional  
571 contagion through social networks. *Proceedings of the National Academy of Sciences*, 111(24), 8788 LP –  
572 8790. doi:10.1073/pnas.1320040111
- 573 Langley, R. L. (2005). Animal-Related Fatalities in the United States—An Update. *Wilderness & Environmental*  
574 *Medicine*, 16(2), 67–74. doi:[https://doi.org/10.1580/1080-6032\(2005\)16\[67:AFITUS\]2.0.CO;2](https://doi.org/10.1580/1080-6032(2005)16[67:AFITUS]2.0.CO;2)
- 575 Leather, S. R. (2013). Institutional vertebratism hampers insect conservation generally; not just saproxylic beetle  
576 conservation. *Animal Conservation*, 16, 379–380. doi:10.1111/acv.12068
- 577 Lee, C. S., & Ma, L. (2012). News sharing in social media: The effect of gratifications and prior experience.  
578 *Computers in Human Behavior*, 28, 331–339. doi:10.1016/j.chb.2011.10.002

- 579 Lemelin, R. H., & Yen, A. (2015). Human-Spider Entanglements: Understanding and Managing the Good, the Bad,  
580 and the Venomous. *Anthrozoös*, 28(2), 215–228. doi:10.1080/08927936.2015.11435398
- 581 Mammola, S., Michalik, P., Hebets, E. A., & Isaia, M. (2017). Record breaking achievements by spiders and the  
582 scientists who study them. *PeerJ*, 5(10), e3972. doi:10.7717/peerj.3972
- 583 Merckelbach, H., Muris, P., & Schouten, E. (1996). Pathways to fear in spider phobic children. *Behaviour Research*  
584 *and Therapy*, 34(11–12), 935–938. doi:10.1016/S0005-7967(96)00052-6
- 585 Michalko, R., Pekár, S., Dul'a, M., & Entling, M. H. (2019). Global patterns in the biocontrol efficacy of spiders: A  
586 meta-analysis. *Global Ecology and Biogeography*, 28(9), 1366–1378. doi:10.1111/geb.12927
- 587 Michalko, R., Pekar, S., & Entling, M. H. (2019). An updated perspective on spiders as generalist predators in  
588 biological control. *OECOLOGIA*, 189(1), 21–36. doi:10.1007/s00442-018-4313-1
- 589 Michalski, K., & Michalski, S. (2010). *Spider*. London, UK: Reaktion Books Ltd.
- 590 Milano, F., et al. (in prep.) Spider conservation in Europe.
- 591 Milano, F., Pantini, P., Mammola, S., & Isaia, M. (2017). La conservazione dell'araneofauna in Italia e in Europa  
592 [Spider conservation in Italy and Europe]. *Atti Accademia Nazionale Italiana Di Entomologia*, 65, 91–103.
- 593 Moore, S. J., Leung, C. L., Norton, H. K., & Cochran, J. R. (2013). Engineering Agatoxin, a Cystine-Knot Peptide  
594 from Spider Venom, as a Molecular Probe for In Vivo Tumor Imaging. *PLOS ONE*, 8(4), e60498. Retrieved  
595 from <https://doi.org/10.1371/journal.pone.0060498>
- 596 Nanni, V., Caprio, E., Bombieri, G., Schiaparelli, S., Chiorri, C., Mammola, S., ... Penteriani, V. (2020). Social  
597 Media and Large Carnivores: Sharing Biased News on Attacks on Humans. *Frontiers in Ecology and*  
598 *Evolution*, 8, 71. doi:10.3389/fevo.2020.00071
- 599 Nentwig, W., Blick, T., Bosmans, R., Gloor, D., Hänggi, A., & Kropf, C. (2020). Araneae - Spider of Europe.  
600 doi:<https://doi.org/10.24436/1>
- 601 Nentwig, W., Gnädinger, M., Fuchs, J., & Ceschi, A. (2013). A two year study of verified spider bites in  
602 Switzerland and a review of the European spider bite literature. *Toxicon*, 73, 104–110.  
603 doi:10.1016/j.toxicon.2013.07.010
- 604 Nentwig, W., & Kuhn-Nentwig, L. (2013). Spider venoms potentially lethal to humans. In W. Nentwig (Ed.), *Spider*  
605 *Ecophysiology*. Heidelberg: Springer. doi:10.1007/978-3-642-33989-9\_19
- 606 Nentwig, W., Pantini, P., & Vetter, R. S. (2017). Distribution and medical aspects of *Loxosceles rufescens*, one of  
607 the most invasive spiders of the world (Araneae: Sicariidae). *Toxicon*, 132, 19–28.  
608 doi:10.1016/j.toxicon.2017.04.007
- 609 Nyffeler, M., & Birkhofer, K. (2017). An estimated 400–800 million tons of prey are annually killed by the global  
610 spider community. *The Science of Nature*, 104(3), 30. doi:10.1007/s00114-017-1440-1
- 611 Pantini, P., & Isaia, M. (2019). Araneae.it: the online Catalog of Italian spiders, with addenda on other Arachnid  
612 Orders occurring in Italy (Arachnida: Araneae, Opiliones, Palpigradi, Pseudoscorpionida, Scorpiones,  
613 Solifugae). Online at [www.araneae.it](http://www.araneae.it), accessed on {26 April 2020}. *Fragmenta Entomologica*, 52(2), 127–  
614 152. doi:10.4081/fe.2019.374

- 615 Papworth, S. K., Nghiem, T. P. L., Chimalakonda, D., Posa, M. R. C., Wijedasa, L. S., Bickford, D., & Carrasco, L.  
616 R. (2015). Quantifying the role of online news in linking conservation research to Facebook and Twitter.  
617 *Conservation Biology*, 29(3), 825–833. doi:10.1111/cobi.12455
- 618 Pepe, R. (2005). Basi zoologiche-naturalistiche del tarantismo nel Salento. *Thalassia Salentina*, 27(2004), 47–62.
- 619 Pezzi, M., Giglio, A. M., Scozzafava, A., Filippelli, O., Serafino, G., & Verre, M. (2016). Spider Bite: A Rare Case  
620 of Acute Necrotic Arachnidism with Rapid and Fatal Evolution. *Case Reports in Emergency Medicine*, 2016,  
621 7640789. doi:10.1155/2016/7640789
- 622 Planas, E., Saupe, E. E., Lima-Ribeiro, M. S., Peterson, A. T., & Ribera, C. (2014). Ecological niche and  
623 phylogeography elucidate complex biogeographic patterns in *Loxosceles rufescens* (Araneae, Sicariidae) in  
624 the Mediterranean Basin. *BMC EVOLUTIONARY BIOLOGY*, 14. doi:10.1186/s12862-014-0195-y
- 625 Prokop, P., & Tunnicliffe, S. D. (2008). ‘Disgusting’ animals: Primary school children’s attitudes and myths of bats  
626 and spiders. *Eurasia Journal of Mathematics, Science and Technology Education*, 4(2), 87–97.  
627 doi:10.12973/ejmste/75309
- 628 R Core Team. (2018). R: A Language and Environment for Statistical Computing. Vienna, Austria: R Foundation  
629 for Statistical Computing.
- 630 Saez, N. J., Senff, S., Jensen, J. E., Er, S. Y., Herzig, V., Rash, L. D., & King, G. F. (2010). Spider-venom peptides  
631 as therapeutics. *Toxins*, 2(12), 2851–2871. doi:10.3390/toxins2122851
- 632 Samways, M. J., Barton, P. S., Birkhofer, K., Chichorro, F., Deacon, C., Fartmann, T., ... Cardoso, P. (2020).  
633 Solutions for humanity on how to conserve insects. *Biological Conservation*, 242, 108427.  
634 doi:10.1016/J.BIOCON.2020.108427
- 635 Savage, I. (2013). Comparing the fatality risks in United States transportation across modes and over time. *Research*  
636 *in Transportation Economics*, 43, 9–22. doi:10.1016/j.retrec.2012.12.011
- 637 Simaika, J. P., & Samways, M. J. (2018). Insect conservation psychology. *Journal of Insect Conservation*, 22(3),  
638 635–642. doi:10.1007/s10841-018-0047-y
- 639 Singh, S. (2009). Governing Anti-conservation Sentiments: Forest Politics in Laos. *Human Ecology*, 37(6), 749.  
640 doi:10.1007/s10745-009-9276-8
- 641 Slovic, P., & Peters, E. (2006). Risk perception and affect. *Current Directions in Psychological Science*, 15, 322–  
642 325. doi:10.1111/j.1467-8721.2006.00461.x
- 643 Smith-Janik, S. B., & Teachman, B. A. (2008). Impact of priming on explicit memory in spider fear. *Cognitive*  
644 *Therapy and Research*, 32(2), 291–302. doi:10.1007/s10608-007-9122-5
- 645 Straka, T. M., Miller, K. K., & Jacobs, M. H. (2020). Understanding the acceptability of wolf management actions:  
646 roles of cognition and emotion. *Human Dimensions of Wildlife*, 25(1), 33–46.  
647 doi:10.1080/10871209.2019.1680774
- 648 Strommen, E. (1995). Lions and tigers and bears, oh my! children’s conceptions of forests and their inhabitants.  
649 *Journal of Research in Science Teaching*, 32(7), 683–698. doi:10.1002/tea.3660320704
- 650 Stuber, M., & Nentwig, W. (2016). How informative are case studies of spider bites in the medical literature?  
651 *Toxicon*, 114, 40–44. doi:10.1016/j.toxicon.2016.02.023

- 652 Suchard, J. R. (2011). ‘Spider bite’ lesions are usually diagnosed as skin and soft-tissue infections. *Journal of*  
653 *Emergency Medicine*, 41(5), 473–481. doi:10.1016/j.jemermed.2009.09.014
- 654 Taucare-Rios, A., Nentwig, W., Bizama, G., & Bustamante, R. O. (2018). Matching global and regional distribution  
655 models of the recluse spider *Loxosceles rufescens*: to what extent do these reflect niche conservatism?  
656 *MEDICAL AND VETERINARY ENTOMOLOGY*, 32(4), 490–496. doi:10.1111/mve.12311
- 657 Turnbull, A. L. (1973). Ecology of the True Spiders (Araneomorphae). *Annual Review of Entomology*, 18(1), 305–  
658 348. doi:10.1146/annurev.en.18.010173.001513
- 659 Vetter, R. S. (2004). Myths about spider envenomations and necrotic skin lesions. *Lancet*, 364, 484–485.  
660 doi:10.1016/S0140-6736(04)16824-4
- 661 Vetter, R. S., Hinkle, N. C., & Ames, L. M. (2009). Distribution of the Brown Recluse Spider (Araneae: Sicariidae)  
662 in Georgia with Comparison to Poison Center Reports of Envenomations. *Journal of Medical Entomology*,  
663 46(1), 15–20. doi:10.1603/033.046.0103
- 664 Vetter, R. S., & Isbister, G. K. (2008). Medical Aspects of Spider Bites. *Annual Review of Entomology*, 53, 409–  
665 429. doi:10.1146/annurev.ento.53.103106.093503
- 666 Vetter, R. S., Warrell, D. A., Isbister, G. K., White, J., Currie, B. J., & Bush, S. P. (2005). Spider bites: Addressing  
667 mythology and poor evidence. *The American Journal of Tropical Medicine and Hygiene*, 72(4), 361–364.  
668 doi:10.4269/ajtmh.2005.72.361
- 669 Vosoughi, S., Roy, D., & Aral, S. (2018). The spread of true and false news online. *Science*, 359(6380), 1146 LP –  
670 1151. doi:10.1126/science.aap9559
- 671 Weeks, B. E., Ardèvol-Abreu, A., & Gil de Zúñiga, H. (2015). Online Influence? Social Media Use, Opinion  
672 Leadership, and Political Persuasion. *International Journal of Public Opinion Research*, 29(2), 214–239.  
673 doi:10.1093/ijpor/edv050
- 674 White, J. (2003). Debunking spider bite myths. *Medical Journal of Australia*, 179(4), 180–181. doi:10.5694/j.1326-  
675 5377.2003.tb05493.x
- 676 Wickham, H. (2016). *ggplot2: Elegant Graphics for Data Analysis*. New York: Springer-Verlag.
- 677 Wilson, R. E., Gosling, S. D., & Graham, L. T. (2012). A Review of Facebook Research in the Social Sciences.  
678 *Perspectives on Psychological Science*, 7(3), 203–220. doi:10.1177/1745691612442904
- 679 World Spider Catalog. (2020). World Spider Catalog. Version 20.5. doi:10.24436/2
- 680 Zainal Abidin, Z. A., & Jacobs, M. (2019). Relationships between valence towards wildlife and wildlife value  
681 orientations. *Journal for Nature Conservation*, 49, 63–68. doi:10.1016/J.JNC.2019.02.007
- 682 Zuur, A. F., & Ieno, E. N. (2016). A protocol for conducting and presenting results of regression-type analyses.  
683 *Methods in Ecology and Evolution*, 7(6), 636–645. doi:10.1111/2041-210X.12577
